# Supplementary material for: Somatic NAP1L1 p.D349E promotes cardiac hypertrophy through cGAS-STING-IFN signaling
Source: Springer Nature journal article supplement (doi:10.1038/s41467-025-58453-7), 2025-04-01
Supplement: MOESM1 [file 41467_2025_58453_MOESM1_ESM.pdf]

**Supplementary Table S1. Baseline information of the replication cohort**

|                                 | Gene-elusive<br>Patients | Patients<br>with<br>somatic NAP1L1<br>p.D349E | p value |
|---------------------------------|--------------------------|-----------------------------------------------|---------|
| Number of Patients              | 37                       | 12                                            |         |
| Male, n                         | 21                       | 7                                             | 0.87    |
| Age at diagnosis (years)        | 38±13.63                 | 42±10.56                                      | 0.58    |
| Duration of disease (years)     | 6.7±3.8                  | 7.4±2.6                                       | 0.68    |
| BMI (kg/m2)                     | 21.3±2.7                 | 20.6±3.9                                      | 0.83    |
| Co-morbidities                  |                          |                                               |         |
| Diabetes, n                     | 8                        | 4                                             | 0.72    |
| Hypercholesterolemia, n         | 5                        | 2                                             | 0.64    |
| Atrial Fibrillation, n          | 2                        | 0                                             | 0.16    |
| Heart Rate, n                   | 80.4±7.2                 | 77.4±6.8                                      | 0.24    |
| Medications                     |                          |                                               |         |
| Beta blockers, n                | 24                       | 8                                             | 0.74    |
| Calcium channel blockers, n     | 13                       | 4                                             | 0.49    |
| Max. LV Thickness (mm)          | 23.40±4.78               | 21.64±3.76                                    | 0.52    |
| LVEF (%)                        | 64.38±5.17               | 65.53±3.94                                    | 0.19    |
| LV End Diastolic Dimension (mm) | 48.35±6.37               | 46.54±2.07                                    | 0.27    |
| NYHA class II                   | 29                       | 1                                             |         |
| NYHA class III                  | 7                        | 8                                             |         |
| NYHA class IV                   | 1                        | 3                                             |         |

**Supplementary Table S2. ddPCR Sensitivity and Accuracy for Low-Frequency Variant Detection**

| Real VAF (%) | Fam  | Fam+Hex | VAF by ddCPR (%) |
|--------------|------|---------|------------------|
| 0.03         | 3    | 10260   | 0.0292           |
| 0.04         | 4    | 10740   | 0.0372           |
| 0.05         | 5    | 10380   | 0.0482           |
| 0.10         | 13   | 12240   | 0.1062           |
| 0.50         | 57   | 11890   | 0.4794           |
| 1.00         | 125  | 12620   | 0.9905           |
| 2.00         | 238  | 11940   | 1.9933           |
| 5.00         | 596  | 11860   | 5.0253           |
| 10.00        | 1026 | 10280   | 9.9805           |

**Supplementary Table S3. Patients carrying somatic *NAP1L1* D349E**

| <b>Patient ID</b> | <b>Maximal LV wall thickness(mm)</b> | <b>VAF (%)</b> | <b>Identified by</b> |
|-------------------|--------------------------------------|----------------|----------------------|
| D6                | 35                                   | 4.00           | WES+ddPCR            |
| D11               | 36                                   | 1.26           | ddPCR                |
| D26               | 32                                   | 0.87           | ddPCR                |
| D45               | 19                                   | 0.24           | ddPCR                |
| D47               | 22                                   | 2.08           | WES+ddPCR            |
| D55               | 30                                   | 0.45           | ddPCR                |
| D60               | 32                                   | 0.16           | ddPCR                |
| R3                | 25                                   | 2.11           | ddPCR                |
| R7                | 26                                   | 0.31           | ddPCR                |
| R9                | 24                                   | 0.61           | ddPCR                |
| R16               | 25                                   | 1.52           | ddPCR                |
| R18               | 30                                   | 0.91           | ddPCR                |
| R22               | 23                                   | 1.08           | ddPCR                |
| R26               | 38                                   | 0.77           | ddPCR                |
| R31               | 21                                   | 0.53           | ddPCR                |
| R35               | 27                                   | 2.31           | ddPCR                |
| R38               | 29                                   | 3.04           | ddPCR                |
| R42               | 27                                   | 0.87           | ddPCR                |
| R48               | 30                                   | 0.62           | ddPCR                |

# D6 to D60 represent seven patients in the discovery cohort, and R3 to R48 represent twelve patients in the replication cohort.

**Supplementary Table S4. 58 genes related to HCM**

|               |              |              |              |               |               |               |
|---------------|--------------|--------------|--------------|---------------|---------------|---------------|
| <i>ABCC9</i>  | <i>CALR3</i> | <i>FLNC</i>  | <i>LZTR1</i> | <i>MYOZ2</i>  | <i>RIT1</i>   | <i>TRIM63</i> |
| <i>ACTA1</i>  | <i>CASQ2</i> | <i>FXN</i>   | <i>MYBP3</i> | <i>MYPN</i>   | <i>RYR2</i>   | <i>TTN</i>    |
| <i>ACTC1</i>  | <i>CAV3</i>  | <i>GAA</i>   | <i>MYH6</i>  | <i>NEXN</i>   | <i>SLC254</i> | <i>TTR</i>    |
| <i>ACTN2</i>  | <i>COX15</i> | <i>GLA</i>   | <i>MYH7</i>  | <i>OBSCN</i>  | <i>TCAP</i>   | <i>VCL</i>    |
| <i>ALPK3</i>  | <i>CRYAB</i> | <i>JPH2</i>  | <i>MYL2</i>  | <i>PDLIM3</i> | <i>TMPO</i>   |               |
| <i>ANKR1</i>  | <i>CSRP3</i> | <i>KCNQ1</i> | <i>MYL3</i>  | <i>PLN</i>    | <i>TNNC1</i>  |               |
| <i>BAG3</i>   | <i>DES</i>   | <i>KLF10</i> | <i>MYLK2</i> | <i>PRKA2</i>  | <i>TNNI3</i>  |               |
| <i>CACNIC</i> | <i>DSP</i>   | <i>LAMP2</i> | <i>MYO6</i>  | <i>PTPN11</i> | <i>TNNT2</i>  |               |
| <i>CACN2</i>  | <i>FHL1</i>  | <i>LDB3</i>  | <i>MYOM1</i> | <i>RAF1</i>   | <i>TPM1</i>   |               |

**Supplementary Figure S1. Workflow of the discovery cohort.**

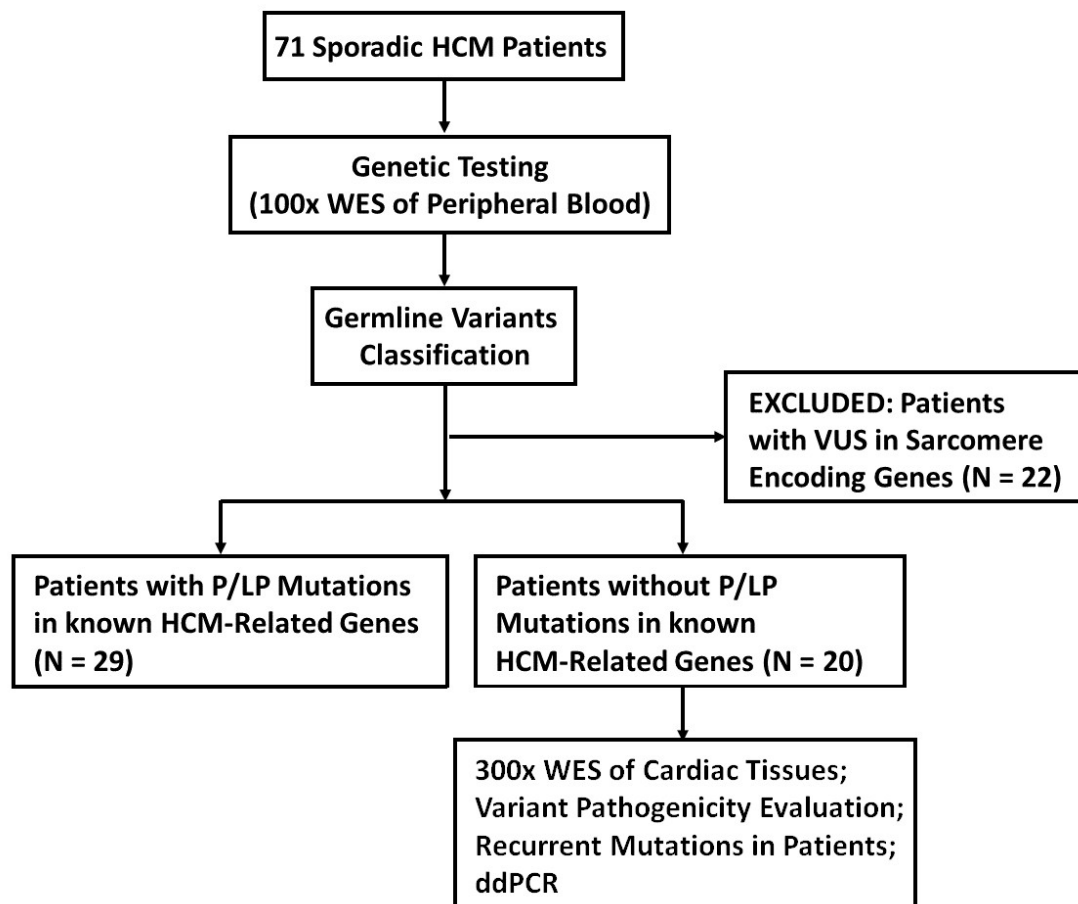

**Figure legend:** Flow diagram of study participants in the discovery cohort.

Abbreviations: HCM, hypertrophic cardiomyopathy; P/LP variants, pathogenic/likely pathogenic variants; VUS, variants of uncertain significance; WES, whole exome sequencing.

## Supplementary Figure S2. Representative negative ddPCR plots and validation of ddPCR

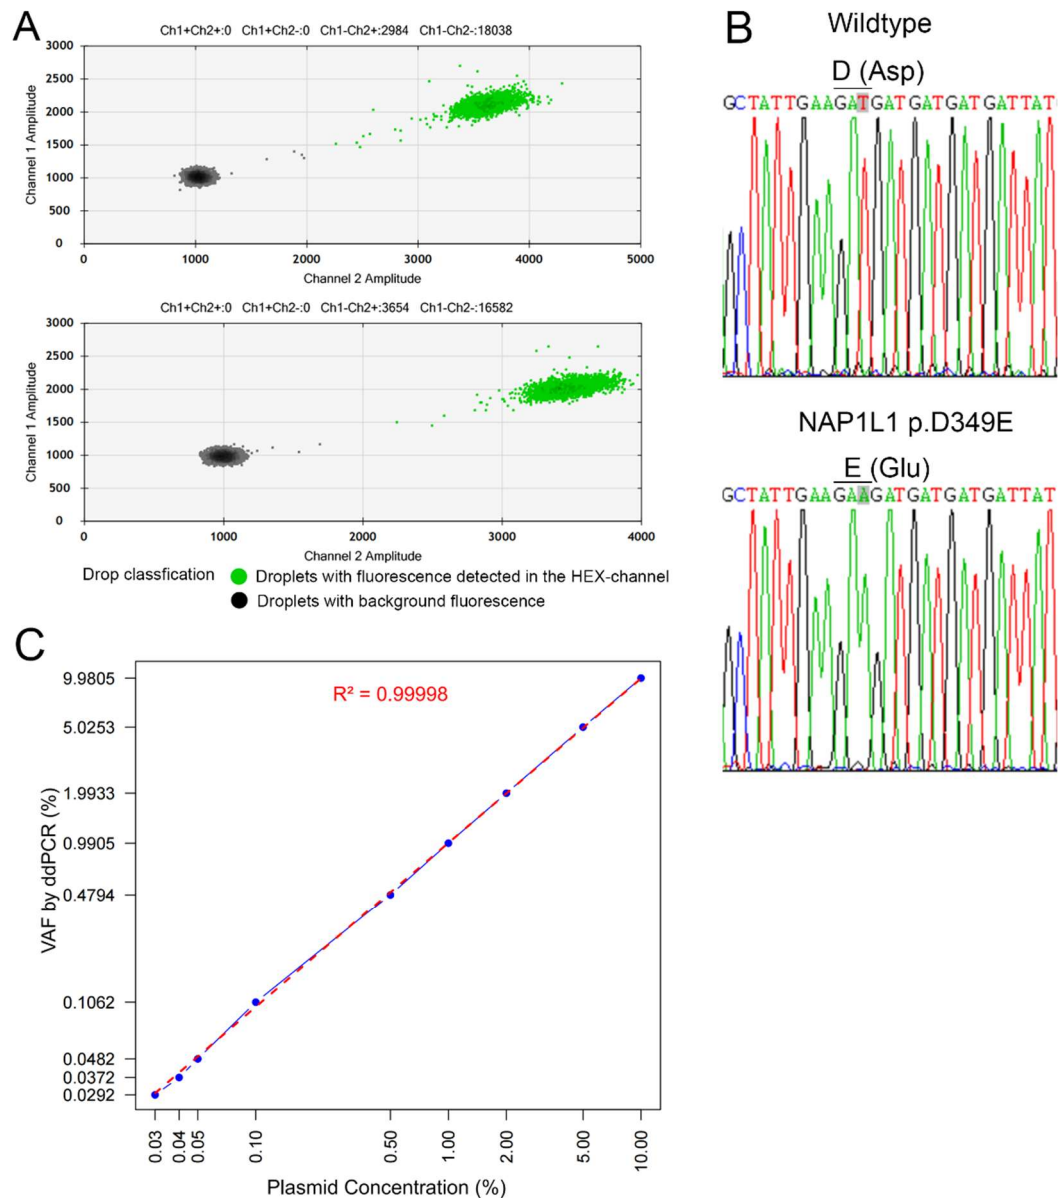

**Figure legends:** **A**, *Upper*, plot of ddPCR result on negative control H7; *Lower*, plot of ddPCR result on negative control H14; **B**, Validation of NAP1L1 p.D349E. PCR amplicons were cloned and subjected to Sanger sequencing analysis. The sequencing electrophoretograms are shown (*Left*, wild-type allele; *Right*, mutant allele); **C**, Correlation curve of observed VAFs (y-axis) versus expected VAFs (x-axis) for each plasmid mixture. Plasmid mixtures containing the target somatic variant at defined

variant allele frequencies (VAFs) ranging from 0.03% to 10% were analyzed by ddPCR.

**Supplementary Figure S3. IGV of NAP1L1 p.D349E.**

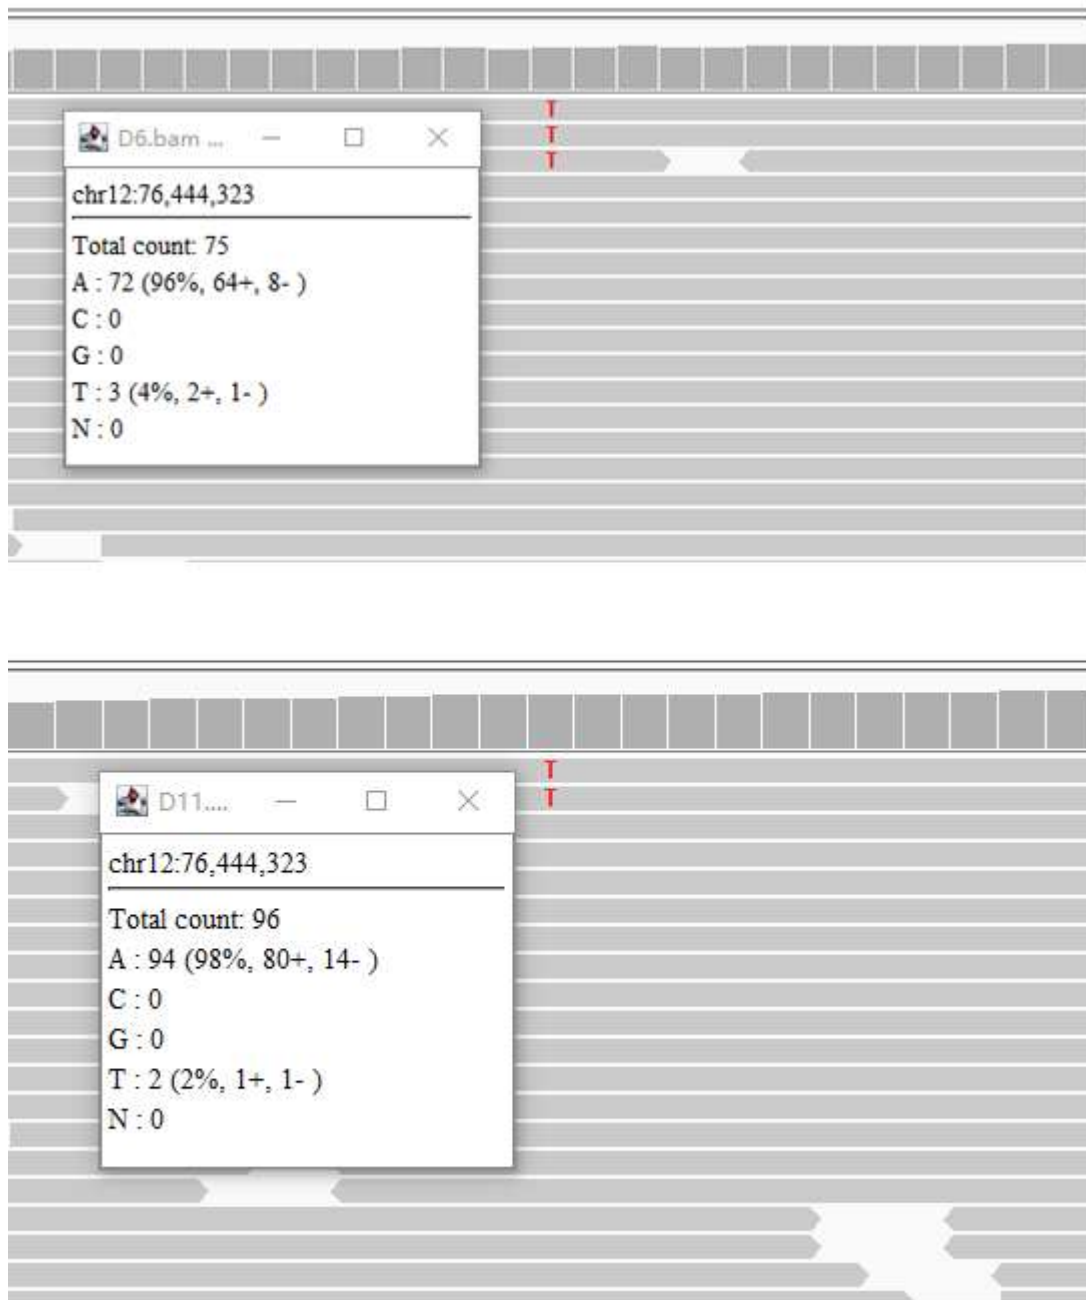

**Figure legend:** Screenshot of somatic variant *NAP1L1* D349E in raw aligned sequence data viewed by integrative genome viewer.



**Supplementary Figure S4. The fractional abundance of NAP1L1 p.D349E in cTnT+ and cTnT- cells**

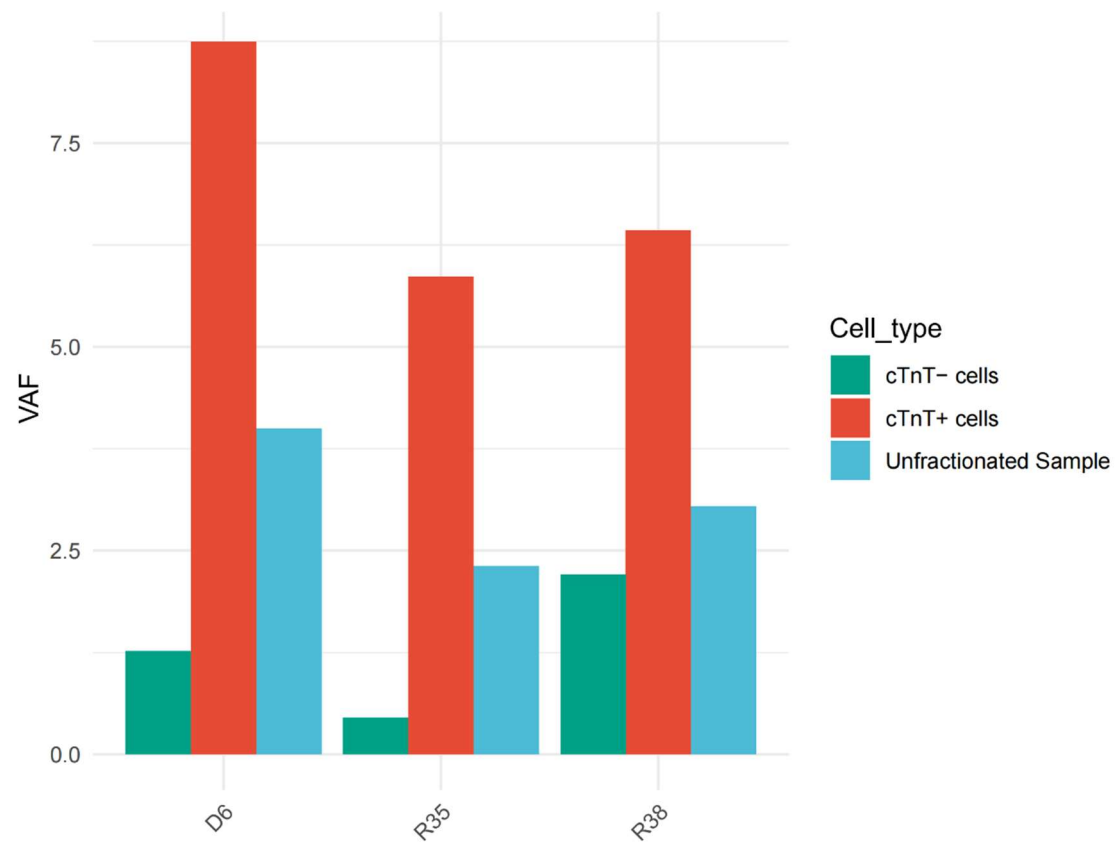

**Figure legend:** The fractional abundance of NAP1L1 p.D349E in cTnT+ and cTnT- cells from patients P6, R35, and R38, as well as in the unfractionated whole tissue sample from an adjacent tissue section.

**A**

**B**

**C**

**D**

**E**

**F**

**G**

**H**

**I**

**Figure legends:** **A**, Heatmap of RNA-seq and upregulated interferon-stimulated genes and Cgas. **B**, Volcano plot of interferon-stimulated genes. **C**, GSEA plot of the upregulated cytosolic DNA-sensing pathway in the *Nap1ll* knockdown group. **D**, GSEA plot of upregulated interferon response pathways in the *Nap1ll* knockdown

group. **E**, Quantification of  $\gamma$ -H2-A.X<sup>+</sup> area in cardiomyocytes. N = 5 for each group and two-tailed unpaired Student's t test was applied; **F**, Quantification of dsDNA<sup>+</sup> and cGAS<sup>+</sup> area. N = 5 for each group and two-tailed unpaired Student's t test was applied; **G**, Elisa of Ifna, Ifnb, Il6 and Il-1 $\beta$  in Nap111 knockdown compared with control group. N = 5 for each group and two-tailed unpaired Student's t test was applied; **H**, Schematic diagram of in vitro simulating the effects of cardiomyocytes and cardiac fibroblasts. Created in BioRender. Lv, C. (2025) <https://BioRender.com/v66i322> ; **I**, qPCR analysis of Irf7, Il6, Stat1, Isg15, Ifit1 and Ifit2 in influenced cardiomyocytes. N = 6 for each group and two-tailed unpaired Student's t test was applied.

# Supplementary Figure S6. Nap11l1 p.D349E in vivo promoted cardiac hypertrophy.

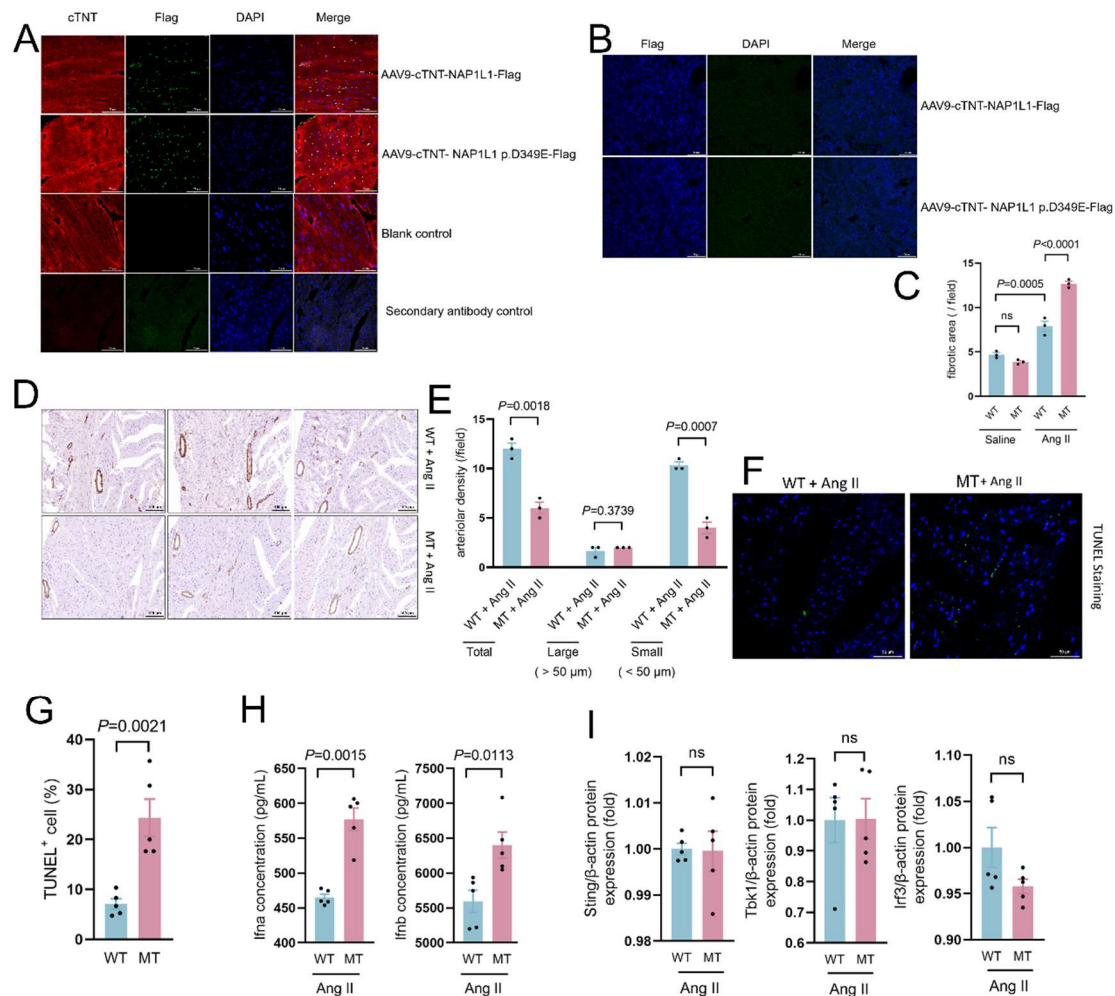

**Figure legends:** **A**, Immunofluorescence staining of cTnT, Flag and DAPI in cardiac tissues; **B**, Immunofluorescence staining of DAPI and Flag in renal parenchymal cells; **C**, Quantification of fibrotic area in WT or MT group with Saline or Ang II. N = 3 for each group and one-way ANOVA with Tukey tests was used for correction of multiple comparisons was applied; **D**, F4/80 staining showing the macrophage infiltration; **E**, Quantification of the density of total and small arteriolar area. N = 3 for each group and two-tailed unpaired Student's t test was applied; **F**, TUNEL staining showing the level of apoptosis. **G**, Quantification of TUNEL+ area. N = 5 for each group and two-tailed unpaired Student's t test was applied; **H**, Elisa of Ifna, Ifnb of the left ventricle tissues WT or MT group with Ang II. N = 5 for each group and two-tailed unpaired Student's t test was applied; **I**, Quantification of total Sting, Tbk1 and Irf3 expression in the WT with Ang II and MT with Ang II groups. N = 5 for each group and two-tailed unpaired

Student's t test was applied.

# Supplementary Figure S7. Nap111 p.D349E knock-in (KI) mice.

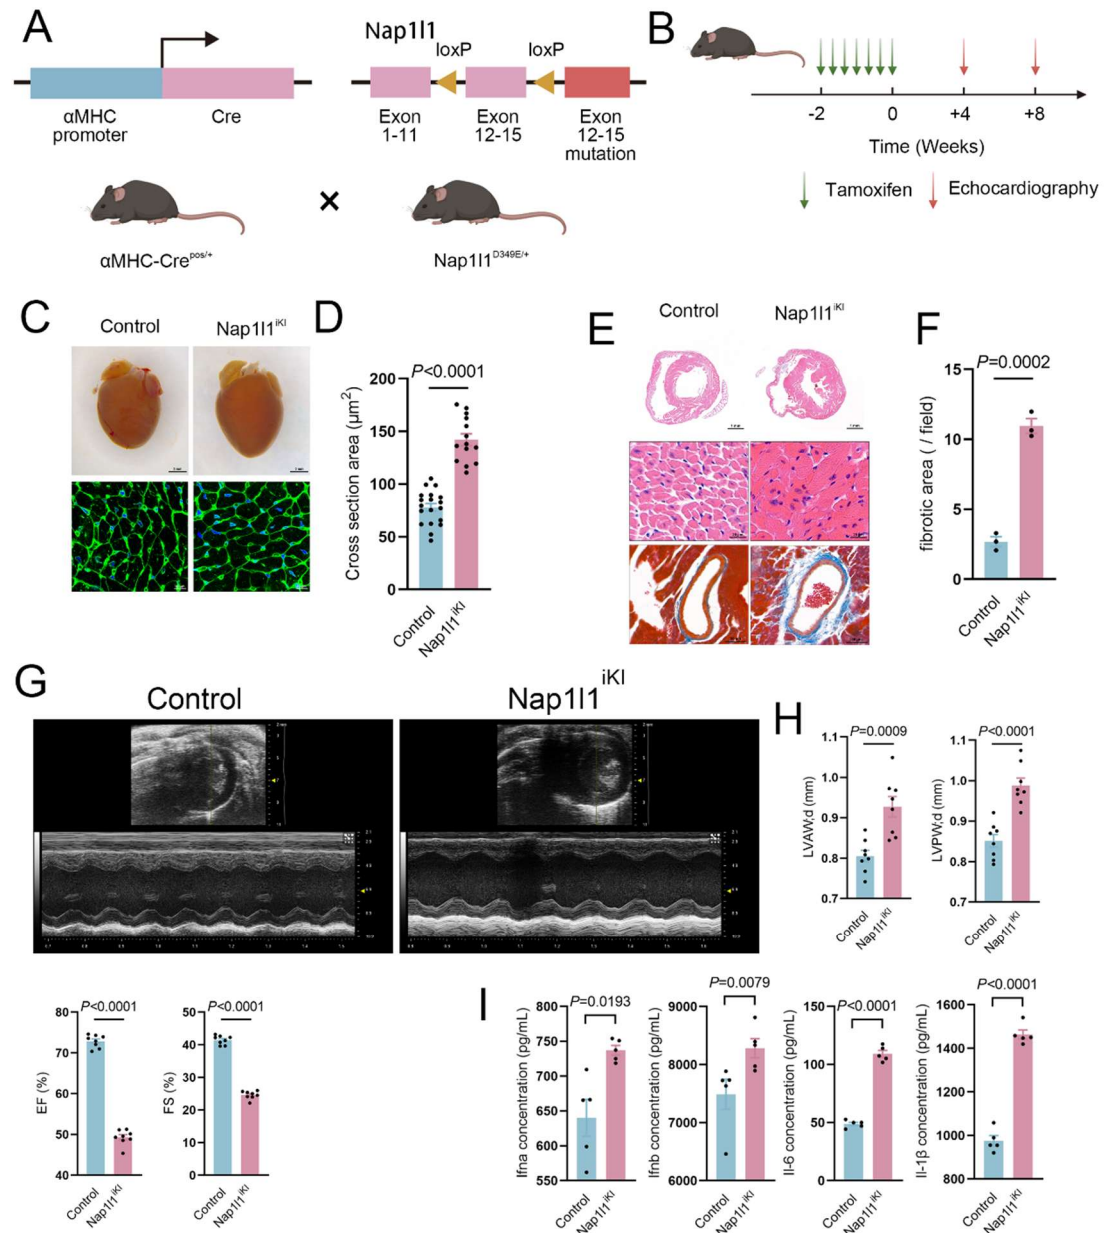

**Figure legends:** A and B, Schematic diagram depicting the experimental strategy used in C57BL6/N mice. Created in BioRender. Lv, C. (2025) <https://BioRender.com/v66i322> C, Representative image of heart and WGA staining; D, Quantification of WGA staining in the control and KI group. N = 19 for the control and N = 14 for Nap111<sup>KI</sup> and two-tailed unpaired Student's t test was applied; E, Representative hematoxylin and eosin staining Masson's trichrome staining; F, Quantification showing the fibrotic area in control and KI group. N = 3 for each group and two-tailed unpaired Student's t test was applied; G, Representative M-mode

echocardiograms of the left ventricle of the control and KI group. **H**, Quantification of left ventricular end-diastolic anterior wall thickness (LVAW; d), left ventricular end-diastolic posterior wall thickness (LVPW; d) ejection fraction (EF), fractional shortening (FS) of the control and KI group. N = 8 for each group and two-tailed unpaired Student's t test was applied; **I**, Elisa of Ifna, Ifnb, Il6 and Il-1 $\beta$  of the left ventricle tissues of the control and KI group. N = 5 for each group. for Ifna, two-tailed Unpaired t test with Welch's correction, for Ifnb, two-tailed Unpaired Mann-Whitney U test and for Il-6 and Il-1b, two-tailed unpaired Student's t test were applied.

# Supplementary Figure S8. Nap11l p.D349E triggered cGAS-Sting-IFN signaling.

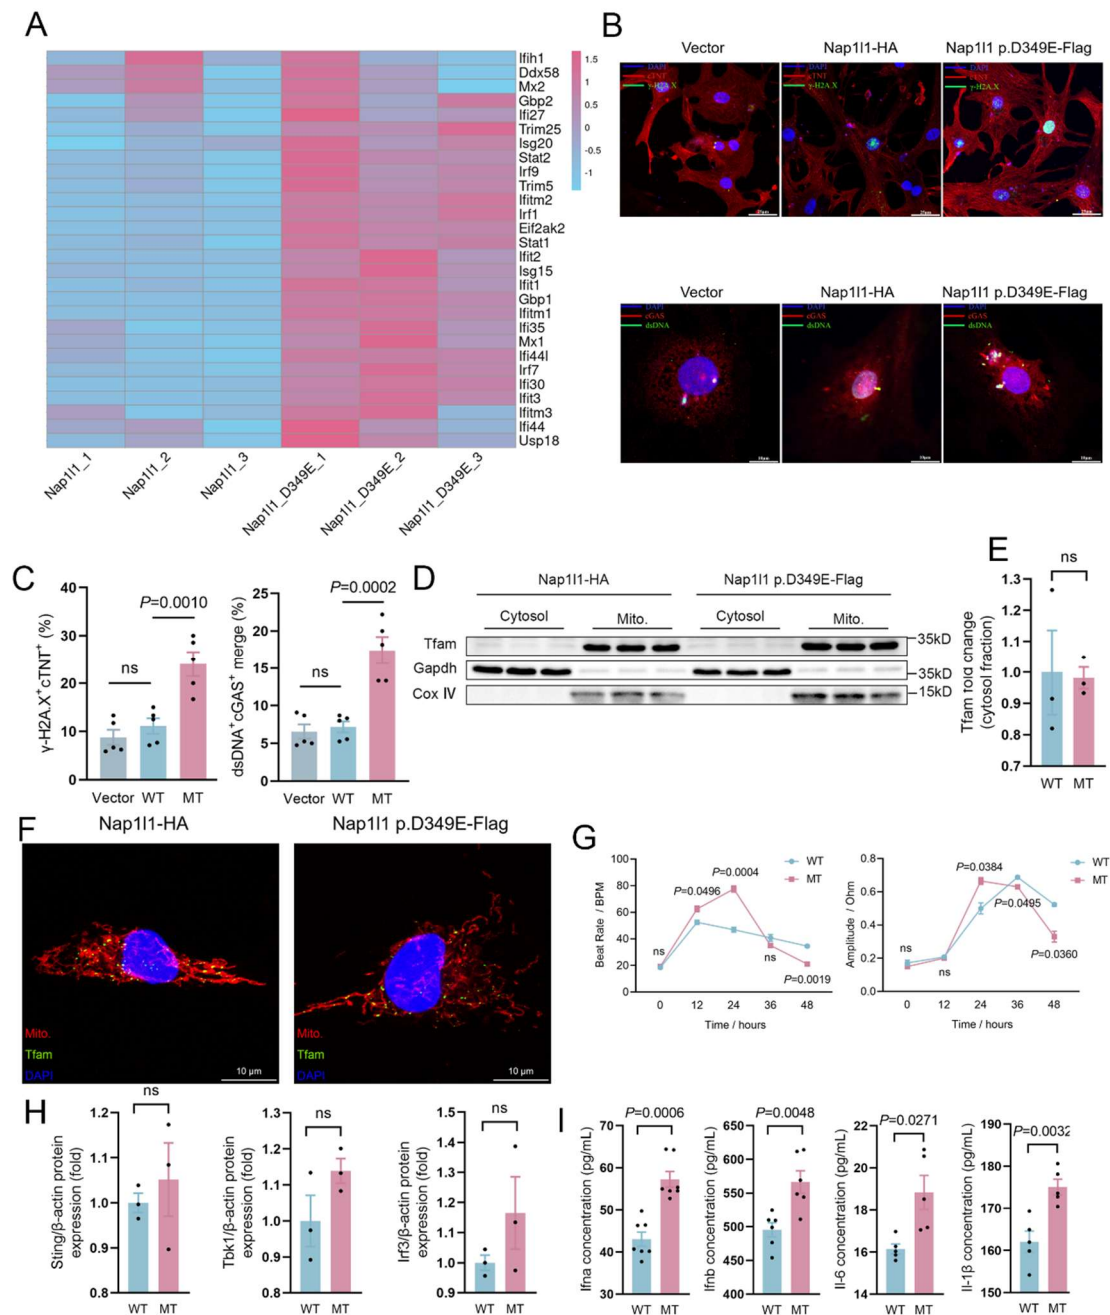

**Figure legends:** **A**, Heatmap of the expression of interferon-stimulated genes in vector, WT and MT groups; **B and C**,  $\gamma$ -H2A.X staining and dsDNA staining and quantification in Vector, WT and MT groups. N = 5 and one-way ANOVA with Tukey tests was used for correction of multiple comparisons; **D and E**, Western blot image and quantification of Tfam in the cytosol and mitochondria. N=3 and two-tailed



unpaired Student's t test were applied; **F**, Mito., Tfam and DAPI staining in WT and MT groups; **G**, Measurement of heart rate and diastolic function over time in WT or MT groups. N = 4 and one-way ANOVA with Tukey tests was used for correction of multiple comparisons; **H**, Quantitative of Sting, Tbk1 and Irf3 in the WT and MT groups. N=3 and two-tailed unpaired Student's t test were applied; **I**, Elisa of Ifna, Ifnb, Il6 and Il-1b in the WT and MT groups. N = 7, 6, 5 and 5 for Ifna, Ifnb, Il-6 and Il-1b, and two-tailed unpaired Student's t test were applied;

**Supplementary Figure S9. The safety of pharmacological inhibition of cGAS-STING-IFN signaling**

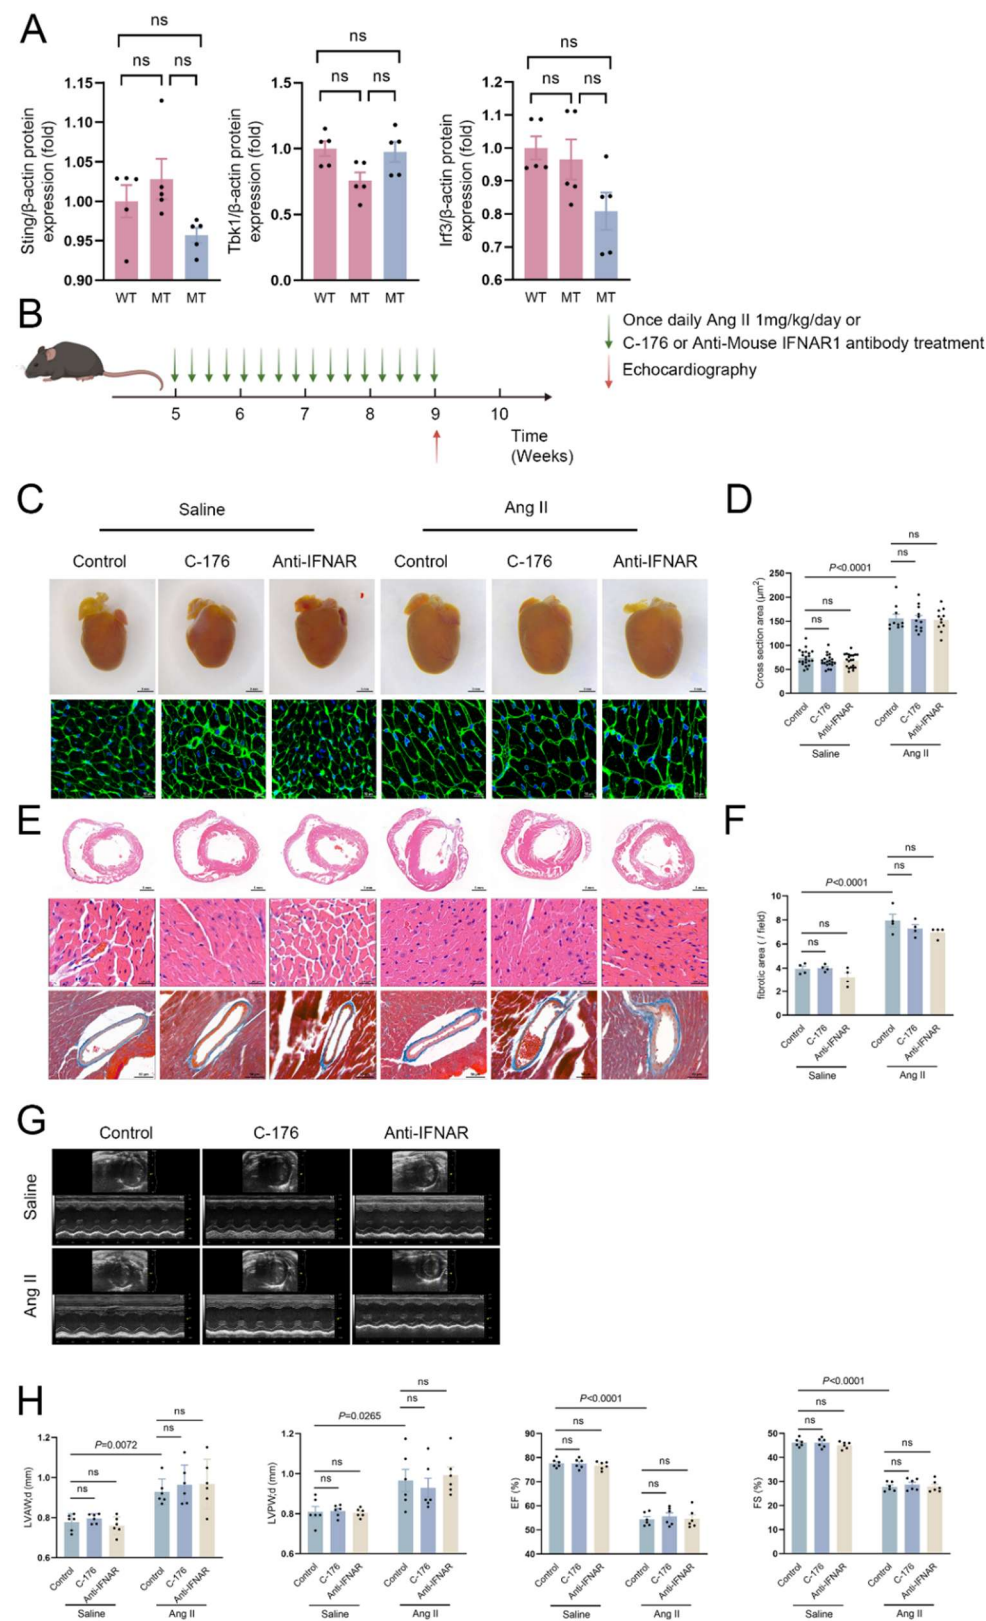

**Figure legends:** **A**, Quantitative of Sting, Tbk1 and Irf3 in the corresponding groups. N = 5 for each group and one-way ANOVA with Tukey tests was used for correction of multiple comparisons; **B**, Schematic diagram depicting the experimental strategy used in C57BL6/N mice. Created in BioRender. Lv, C. (2025) <https://BioRender.com/v66i322>. **C** and **D**, Representative image of heart and wheat germ agglutinin (WGA) staining and quantification of the WT mice treated with C-176 and anti-mouse Ifnar1 antibodies at baseline or exposed to angiotensin II. In Saline group, N = 21 for control, 20 for C-176 and 21 for anti-mouse Ifnar1. In Ang II group, N = 10 for control, 12 for C-176 and 11 for anti-mouse Ifnar1. one-way ANOVA with Tukey tests was used for correction of multiple comparisons was applied; **E** and **F**, Representative hematoxylin and eosin staining Masson's trichrome staining and quantification showing the fibrotic area of the WT mice treated with C-176 and anti-mouse Ifnar1 antibodies at baseline or exposed to angiotensin II. N = 4 for each group and one-way ANOVA with Tukey tests was used for correction of multiple comparisons; **G**, Representative M-mode echocardiograms of the left ventricle of the WT mice treated with C-176 and anti-mouse IFNAR1 antibodies at baseline or exposed to angiotensin II. **H**, Quantification of left ventricular end-diastolic anterior wall thickness (LVAW; d), left ventricular end-diastolic posterior wall thickness (LVPW; d), ejection fraction (EF), fractional shortening (FS). N = 6 for each group and one-way ANOVA with Tukey tests was used for correction of multiple comparisons;
